# Supplementary material for: Need for multiple biomarkers to adjust parameters of closed-loop deep brain stimulation for Parkinson's disease
Source: PubMed Central journal article supplement — Neural Regen Res. 2017 May;12(5):747–8. doi: 10.4103/1673-5374.206642 (PMC5461609; doi:10.4103/1673-5374.206642), 2017-05
Supplement: NRR-12-747_Suppl1.pdf [file NRR-12-747_Suppl1.pdf]

**Additional file:**

**Open peer review report 1 on “Need for multiple biomarkers to adjust parameters of closed-loop deep brain stimulation for Parkinson’s disease”.**

**Reviewer:** Alan D. Dorval, University of Utah, USA

**Comments to the author:**

It is a brief update of the state of closed-loop DBS.

**Minor point:**

On lines 54-58 of page 1: "Typically, this procedure requires three to six months until achieving the optimal setting..." That sentence is unclear, in that it follows a description of the basic closed-loop DBS paradigm. Thus it seems as though you are claiming that programming a closed-loop DBS system typically take 3-6 months, when in fact there is nothing typical about clinical closed-loop DBS systems (at present). You should clarify that the 3-6 months is required to program existing open-loop DBS systems.
